# Supplementary material
Source: PubMed Central journal article supplement (PMC8626443)
Supplement: 41437_2021_475_MOESM1_ESM.pdf [file 41437_2021_475_MOESM1_ESM.pdf]

**SUPPLEMENTARY INFORMATION for:**

**The population genomic structure of green turtles (*Chelonia mydas*) suggests a warm-water corridor for tropical marine fauna between the Atlantic and Indian oceans during the last interglacial**

Jurjan P. van der Zee<sup>1</sup>, Marjolijn J.A. Christianen<sup>1,2</sup>, Martine Bérubé<sup>1,3</sup>, Mabel Nava<sup>4</sup>, Kaj Schut<sup>4</sup>, Frances Humber<sup>5</sup>, Alonzo Alfaro-Núñez<sup>6</sup>, Leontine E. Becking<sup>7,8</sup>, Per J. Palsbøll<sup>1,3</sup>

<sup>1</sup>Marine Evolution and Conservation, Groningen Institute for Evolutionary Life Sciences, University of Groningen, Nijenborg 7 9747 AG Groningen, The Netherlands

<sup>2</sup>Aquatic Ecology and Water Quality Management Group, Wageningen University & Research, P.O. Box 47, 6700 AA Wageningen, The Netherlands

<sup>3</sup>Center for Coastal Studies, 5 Holway Avenue, Provincetown, MA 02657, United States

<sup>4</sup>Sea Turtle Conservation Bonaire, P.O. Box 492, Kaya Korona 53 Kralendijk, Bonaire, The Caribbean Netherlands

<sup>5</sup>BlueVentures, Omnibus Business Centre, 41 North Road, London N7 9DP, United Kingdom

<sup>6</sup>Section for Evolutionary Genomics, Department of Biology, University of Copenhagen, Øster Farimagsgade 5, 1353 Copenhagen K, Denmark

<sup>7</sup>Wageningen Marine Research, Ankerpark 27 1781 AG Den Helder, The Netherlands

<sup>8</sup>Marine Animal Ecology Group, Wageningen University & Research, P.O. Box 338, 6700 AH Wageningen, The Netherlands

**Corresponding author:** Jurjan P. van der Zee (jurjanvanderzee@gmail.com)

**Supplementary Table S1.** Barcodes and adapters, total number of reads, reads without RAD-tags, low quality reads, the number of retained reads, and alignment rate per sample. ‘BO’ samples were collected in the Caribbean (CA), ‘MG’ samples in the Southwest Indian Ocean (SWO) and ‘PI’ samples in the East Atlantic (EA). Sample PI070009 aligned poorly (62.04%) and was excluded from subsequent analyses.

| <i>Samples</i> |                        | <i>Library preparation</i> |             | <i>Summary of read statistics</i> |             |            | <i>Alignment</i> |
|----------------|------------------------|----------------------------|-------------|-----------------------------------|-------------|------------|------------------|
| ID             | Adapter-P1             | Adapter-P2                 | Total reads | No RAD-tag                        | Low quality | Retained   | Rate             |
| BO150013       | P1_01_GCATG_HindIII    | P2_05_ACAGTG_Mspl          | 10,968,858  | 118,292                           | 4,895       | 10,845,671 | 95.03%           |
| BO150077       | P1_04_AAGTGA_HindIII   | P2_05_ACAGTG_Mspl          | 10,884,640  | 86,276                            | 7,775       | 10,790,589 | 95.56%           |
| BO150087       | P1_05_ATTACA_HindIII   | P2_05_ACAGTG_Mspl          | 9,831,072   | 69,014                            | 5,053       | 9,757,005  | 95.51%           |
| BO150098       | P1_07_AGAATGA_HindIII  | P2_05_ACAGTG_Mspl          | 14,811,236  | 113,624                           | 9,893       | 14,687,719 | 95.22%           |
| BO150106       | P1_08_AGTTAAT_HindIII  | P2_05_ACAGTG_Mspl          | 15,539,356  | 81,416                            | 7,636       | 15,450,304 | 94.94%           |
| BO150125       | P1_11_AGTGTTAA_HindIII | P2_05_ACAGTG_Mspl          | 16,674,886  | 126,409                           | 10,704      | 16,537,773 | 95.29%           |
| BO150141       | P1_07_AGAATGA_HindIII  | P2_19_GTGAAA_Mspl          | 12,587,234  | 89,705                            | 72,255      | 12,425,274 | 95.65%           |
| BO150161       | P1_08_AGTTAAT_HindIII  | P2_19_GTGAAA_Mspl          | 22,739,154  | 118,525                           | 56,528      | 22,564,101 | 96.05%           |
| BO150164       | P1_12_CACGACCA_HindIII | P2_05_ACAGTG_Mspl          | 19,222,898  | 131,370                           | 17,448      | 19,074,080 | 95.31%           |
| BO150181       | P1_11_AGTGTTAA_HindIII | P2_19_GTGAAA_Mspl          | 15,461,152  | 114,085                           | 68,323      | 15,278,744 | 95.72%           |
| BO150189       | P1_12_CACGACCA_HindIII | P2_19_GTGAAA_Mspl          | 12,952,436  | 155,270                           | 148,139     | 12,649,027 | 95.76%           |
| BO150191       | P1_01_GCATG_HindIII    | P2_06_GCCAAT_Mspl          | 21,271,650  | 164,182                           | 7,114       | 21,100,354 | 95.92%           |
| BO150212       | P1_04_AAGTGA_HindIII   | P2_06_GCCAAT_Mspl          | 7,429,198   | 62,016                            | 3,099       | 7,364,083  | 95.40%           |
| MG060001       | P1_05_ATTACA_HindIII   | P2_12_CTTGTA_Mspl          | 14,424,202  | 95,991                            | 6,450       | 14,321,761 | 95.68%           |
| MG060028       | P1_07_AGAATGA_HindIII  | P2_12_CTTGTA_Mspl          | 9,489,532   | 69,357                            | 4,316       | 9,415,859  | 94.14%           |
| MG060030       | P1_08_AGTTAAT_HindIII  | P2_12_CTTGTA_Mspl          | 14,554,756  | 80,933                            | 6,138       | 14,467,685 | 95.63%           |
| MG070026       | P1_11_AGTGTTAA_HindIII | P2_12_CTTGTA_Mspl          | 10,021,962  | 82,896                            | 4,931       | 9,934,135  | 95.07%           |
| MG070047       | P1_12_CACGACCA_HindIII | P2_12_CTTGTA_Mspl          | 7,809,722   | 57,184                            | 6,281       | 7,746,257  | 94.68%           |
| MG070052       | P1_01_GCATG_HindIII    | P2_19_GTGAAA_Mspl          | 9,918,092   | 112,122                           | 42,653      | 9,763,317  | 95.53%           |
| MG070061       | P1_04_AAGTGA_HindIII   | P2_19_GTGAAA_Mspl          | 8,281,428   | 65,868                            | 33,994      | 8,181,566  | 94.01%           |
| MG070069       | P1_05_ATTACA_HindIII   | P2_19_GTGAAA_Mspl          | 6,671,990   | 47,819                            | 46,094      | 6,578,077  | 94.88%           |
| PI070001       | P1_05_ATTACA_HindIII   | P2_06_GCCAAT_Mspl          | 23,376,394  | 170,206                           | 9,279       | 23,196,909 | 95.32%           |
| PI070002       | P1_07_AGAATGA_HindIII  | P2_06_GCCAAT_Mspl          | 13,925,760  | 125,090                           | 6,056       | 13,794,614 | 95.08%           |
| PI070005       | P1_08_AGTTAAT_HindIII  | P2_06_GCCAAT_Mspl          | 15,443,374  | 84,313                            | 5,963       | 15,353,098 | 95.94%           |
| PI070007       | P1_11_AGTGTTAA_HindIII | P2_06_GCCAAT_Mspl          | 9,314,390   | 79,482                            | 4,022       | 9,230,886  | 95.65%           |
| PI070008       | P1_12_CACGACCA_HindIII | P2_06_GCCAAT_Mspl          | 16,802,588  | 129,319                           | 13,332      | 16,659,937 | 95.48%           |
| PI070009       | P1_01_GCATG_HindIII    | P2_12_CTTGTA_Mspl          | 12,684,248  | 119,312                           | 5,389       | 12,559,547 | 62.04%           |
| PI070011       | P1_04_AAGTGA_HindIII   | P2_12_CTTGTA_Mspl          | 16,150,026  | 116,951                           | 6,911       | 16,026,164 | 95.64%           |

**Supplementary Table S2.** Model parameter prior distributions and values (mean, minimum, maximum and delta;  $\Delta$ ) used in the MIGRATE-N analysis.

| Parameter     | Distribution | Mean  | Minimum | Maximum | $\Delta$ |
|---------------|--------------|-------|---------|---------|----------|
| $\theta$      | Uniform      | 0.005 | 0.00    | 0.01    | 0.001    |
| $M$           | Uniform      | 2500  | 0.00    | 5000    | 500      |
| $\tau$        | Uniform      | 0.05  | 0.00    | 0.1     | 0.01     |
| $\tau_\sigma$ | Uniform      | 0.05  | 0.00    | 0.1     | 0.01     |

**Supplementary Table S3.** Total number of SNPs across locations, SNPs per location, private alleles and nucleotide diversity ( $\pi$ ) per region (A) prior to additional filtering and (B) after excluding SNPs with a mean depth across samples below 30x or above 300x and (C) additionally thinning SNPs within 100,000bp windows.

|   | Location | SNPs (total) | SNPs (per location) | Private alleles | $\pi$ |
|---|----------|--------------|---------------------|-----------------|-------|
| A | CA       | 156,439      | 99,984              | 46,359          | 0.133 |
|   | EA       | 156,439      | 54,696              | 9,681           | 0.110 |
|   | SWO      | 156,439      | 83,634              | 42,579          | 0.130 |
| B | CA       | 95,213       | 61,959              | 25,559          | 0.147 |
|   | EA       | 95,213       | 35,929              | 5,138           | 0.123 |
|   | SWO      | 95,213       | 54,404              | 25,588          | 0.145 |
| C | CA       | 12,035       | 7,733               | 3,385           | 0.140 |
|   | EA       | 12,035       | 4,391               | 699             | 0.118 |
|   | SWO      | 12,035       | 6,643               | 3,310           | 0.138 |

**Supplementary Table S4.** The amount of missing data per sample for the data prior to additional filtering (*Standard*; i.e. standard STACKS output; Supplementary Figure S1), after excluding SNPs with mean depth across samples below 30x or above 300x (*Depth-filtered*) and additionally thinning SNPs within 100,000 bp windows (*Unlinked*).

| Samples  | Missing data    |                       |                 |
|----------|-----------------|-----------------------|-----------------|
|          | <i>Standard</i> | <i>Depth-filtered</i> | <i>Unlinked</i> |
| BO150013 | 2.6%            | 1.4%                  | 1.5%            |
| BO150077 | 2.5%            | 1.7%                  | 1.8%            |
| BO150087 | 3.4%            | 1.6%                  | 1.6%            |
| BO150098 | 1.5%            | 1.2%                  | 1.4%            |
| BO150106 | 2.1%            | 2.1%                  | 1.6%            |
| BO150125 | 1.7%            | 1.8%                  | 1.7%            |
| BO150141 | 3.3%            | 1.5%                  | 1.6%            |
| BO150164 | 1.0%            | 0.9%                  | 0.9%            |
| BO150161 | 1.8%            | 1.8%                  | 1.7%            |
| BO150181 | 2.2%            | 1.6%                  | 1.6%            |
| BO150189 | 2.4%            | 1.4%                  | 1.5%            |
| BO150191 | 1.5%            | 1.2%                  | 1.1%            |
| BO150212 | 6.5%            | 2.4%                  | 2.0%            |
| PI070001 | 1.0%            | 0.8%                  | 0.9%            |
| PI070002 | 1.7%            | 1.1%                  | 1.1%            |
| PI070005 | 1.7%            | 1.3%                  | 1.0%            |
| PI070007 | 3.6%            | 1.4%                  | 1.4%            |
| PI070008 | 0.9%            | 0.7%                  | 0.9%            |
| PI070011 | 1.8%            | 1.5%                  | 1.6%            |
| MG060001 | 0.8%            | 0.8%                  | 1.0%            |
| MG060028 | 2.1%            | 1.8%                  | 2.2%            |
| MG060030 | 1.4%            | 1.5%                  | 1.3%            |
| MG070026 | 2.4%            | 2.2%                  | 2.5%            |
| MG070047 | 1.6%            | 0.8%                  | 1.0%            |
| MG070052 | 3.7%            | 1.9%                  | 2.1%            |
| MG070061 | 5.5%            | 2.2%                  | 2.1%            |
| MG070069 | 5.4%            | 2.0%                  | 2.4%            |

**Supplementary Table S5.** Pairwise genetic differentiation among the Caribbean (CA), East Atlantic (EA) and Southwest Indian Ocean (SWO) estimated using Hudson's  $F_{ST}$ , and Weir and Cockerham's  $\theta$ , and the number of 'privately shared alleles' (i.e., alleles only found in the two pairwise compared locations).

| Location 1 | Location 2 | Hudson's $F_{ST}$ | Weir & Cockerham's $\theta$ | Shared alleles |
|------------|------------|-------------------|-----------------------------|----------------|
| CA         | EA         | 0.110             | 0.096                       | 1305           |
| CA         | SWO        | 0.159             | 0.153                       | 946            |
| EA         | SWO        | 0.180             | 0.170                       | 293            |

**Supplementary Table S6.** The mean number of SNPs and the mean, standard deviation (SD), lower (2.5%) and upper boundaries (97.5%) of the 95% confidence interval (CI) of estimates of Hudson's  $F_{ST}$  as a function of sample size ( $n = 1,000$  simulated datasets per sample size).

| Sample size | SNPs   | Mean  | SD    | CI (2.5%) | CI (97.5%) |
|-------------|--------|-------|-------|-----------|------------|
| 2           | 2049.0 | 0.091 | 0.009 | 0.073     | 0.109      |
| 3           | 2359.8 | 0.091 | 0.007 | 0.078     | 0.105      |
| 4           | 2576.6 | 0.091 | 0.006 | 0.080     | 0.102      |
| 5           | 2733.8 | 0.091 | 0.005 | 0.081     | 0.101      |
| 6           | 2866.6 | 0.091 | 0.005 | 0.082     | 0.100      |
| 7           | 2976.7 | 0.091 | 0.004 | 0.083     | 0.099      |
| 8           | 3067.9 | 0.091 | 0.004 | 0.083     | 0.099      |
| 9           | 3148.7 | 0.091 | 0.004 | 0.083     | 0.099      |
| 10          | 3221.6 | 0.091 | 0.004 | 0.084     | 0.098      |
| 15          | 3498.9 | 0.091 | 0.003 | 0.085     | 0.098      |
| 20          | 3689.4 | 0.091 | 0.003 | 0.085     | 0.097      |
| 25          | 3836.8 | 0.091 | 0.003 | 0.085     | 0.097      |
| 50          | 4279.1 | 0.091 | 0.003 | 0.085     | 0.097      |
| 75          | 4536.2 | 0.091 | 0.003 | 0.086     | 0.096      |
| 100         | 4711.9 | 0.091 | 0.003 | 0.086     | 0.096      |

**Supplementary Table S7.** The mean number of SNPs and the mean, standard deviation (SD), lower (2.5%) and upper boundaries (97.5%) of the 95% confidence interval (CI) of estimates of Weir and Cockerham's  $\theta$  as a function of sample size ( $n = 1,000$  simulated datasets per sample size).

| Sample size | SNPs   | Mean  | SD    | CI (2.5%) | CI (97.5%) |
|-------------|--------|-------|-------|-----------|------------|
| 2           | 2049.0 | 0.091 | 0.010 | 0.071     | 0.110      |
| 3           | 2359.8 | 0.091 | 0.007 | 0.078     | 0.106      |
| 4           | 2576.6 | 0.091 | 0.006 | 0.080     | 0.103      |
| 5           | 2733.8 | 0.091 | 0.005 | 0.082     | 0.101      |
| 6           | 2866.6 | 0.091 | 0.005 | 0.082     | 0.100      |
| 7           | 2976.7 | 0.091 | 0.004 | 0.083     | 0.099      |
| 8           | 3067.9 | 0.091 | 0.004 | 0.083     | 0.099      |
| 9           | 3148.7 | 0.091 | 0.004 | 0.083     | 0.099      |
| 10          | 3221.6 | 0.091 | 0.004 | 0.083     | 0.098      |
| 15          | 3498.9 | 0.091 | 0.003 | 0.085     | 0.098      |
| 20          | 3689.4 | 0.091 | 0.003 | 0.085     | 0.097      |
| 25          | 3836.8 | 0.091 | 0.003 | 0.085     | 0.097      |
| 50          | 4279.1 | 0.091 | 0.003 | 0.085     | 0.097      |
| 75          | 4536.2 | 0.091 | 0.003 | 0.086     | 0.096      |
| 100         | 4711.9 | 0.091 | 0.003 | 0.086     | 0.096      |

**Supplementary Table S8.** Effective sample sizes (ESS) per parameter for each model per replicate run for a random sub-sample of 5,000 RAD loci.

| Model | Parameter                     | Sub-sample 1 | Sub-sample 2 | Sub-sample 3 | Sub-sample 4 | Sub-sample 5 |
|-------|-------------------------------|--------------|--------------|--------------|--------------|--------------|
| 1     | $\theta_{SWO}$                | 4.45E+09     | 4.47E+09     | 4.45E+09     | 4.47E+09     | 4.48E+09     |
| 1     | $\theta_{CA}$                 | 4.34E+09     | 4.34E+09     | 4.36E+09     | 4.33E+09     | 4.34E+09     |
| 1     | $\theta_{EA}$                 | 4.16E+09     | 4.16E+09     | 4.17E+09     | 4.17E+09     | 4.16E+09     |
| 1     | $M_{CA \rightarrow SWO}$      | 2.19E+09     | 2.19E+09     | 2.19E+09     | 2.20E+09     | 2.19E+09     |
| 1     | $M_{EA \rightarrow SWO}$      | 2.18E+09     | 2.18E+09     | 2.18E+09     | 2.19E+09     | 2.19E+09     |
| 1     | $M_{SWO \rightarrow CA}$      | 2.07E+09     | 2.06E+09     | 2.07E+09     | 2.07E+09     | 2.07E+09     |
| 1     | $M_{EA \rightarrow CA}$       | 2.00E+09     | 1.99E+09     | 2.00E+09     | 2.00E+09     | 2.00E+09     |
| 1     | $M_{SWO \rightarrow EA}$      | 2.19E+09     | 2.18E+09     | 2.19E+09     | 2.19E+09     | 2.19E+09     |
| 1     | $M_{CA \rightarrow EA}$       | 2.15E+09     | 2.15E+09     | 2.15E+09     | 2.16E+09     | 2.16E+09     |
| 1     | Genealogies                   | 3.47E+09     | 3.45E+09     | 3.45E+09     | 3.45E+09     | 3.45E+09     |
| 2     | $\theta_{SWO}$                | 4.66E+09     | 4.70E+09     | 4.67E+09     | 4.69E+09     | 4.73E+09     |
| 2     | $\theta_{CA}$                 | 4.60E+09     | 4.60E+09     | 4.62E+09     | 4.59E+09     | 4.62E+09     |
| 2     | $\theta_{EA}$                 | 3.54E+09     | 3.54E+09     | 3.55E+09     | 3.54E+09     | 3.57E+09     |
| 2     | $M_{CA \rightarrow SWO}$      | 2.46E+09     | 2.47E+09     | 2.46E+09     | 2.47E+09     | 2.49E+09     |
| 2     | $M_{EA \rightarrow SWO}$      | 2.35E+09     | 2.36E+09     | 2.35E+09     | 2.36E+09     | 2.38E+09     |
| 2     | $M_{SWO \rightarrow CA}$      | 2.40E+09     | 2.39E+09     | 2.40E+09     | 2.40E+09     | 2.42E+09     |
| 2     | $M_{EA \rightarrow CA}$       | 2.23E+09     | 2.23E+09     | 2.23E+09     | 2.23E+09     | 2.26E+09     |
| 2     | $M_{SWO \rightarrow EA}$      | 2.19E+09     | 2.19E+09     | 2.19E+09     | 2.20E+09     | 2.21E+09     |
| 2     | $M_{CA \rightarrow EA}$       | 2.22E+09     | 2.20E+09     | 2.21E+09     | 2.21E+09     | 2.23E+09     |
| 2     | $\Delta_{EA \rightarrow SWO}$ | 6.86E+09     | 6.86E+09     | 6.86E+09     | 6.86E+09     | 6.90E+09     |
| 2     | $\Delta_{EA \rightarrow CA}$  | 6.67E+09     | 6.67E+09     | 6.67E+09     | 6.66E+09     | 6.71E+09     |
| 2     | Genealogies                   | 3.49E+09     | 3.49E+09     | 3.49E+09     | 3.49E+09     | 3.51E+09     |
| 3     | $\theta_{SWO}$                | 3.68E+09     | 3.70E+09     | 3.78E+09     | 3.69E+09     | 3.70E+09     |
| 3     | $\theta_{CA}$                 | 4.72E+09     | 4.72E+09     | 4.89E+09     | 4.71E+09     | 4.71E+09     |
| 3     | $\theta_{EA}$                 | 4.46E+09     | 4.45E+09     | 4.61E+09     | 4.46E+09     | 4.46E+09     |
| 3     | $M_{CA \rightarrow SWO}$      | 2.19E+09     | 2.18E+09     | 2.26E+09     | 2.19E+09     | 2.19E+09     |
| 3     | $M_{EA \rightarrow SWO}$      | 2.10E+09     | 2.10E+09     | 2.17E+09     | 2.11E+09     | 2.11E+09     |
| 3     | $M_{SWO \rightarrow CA}$      | 2.43E+09     | 2.43E+09     | 2.52E+09     | 2.44E+09     | 2.44E+09     |
| 3     | $M_{EA \rightarrow CA}$       | 2.42E+09     | 2.42E+09     | 2.50E+09     | 2.42E+09     | 2.43E+09     |
| 3     | $M_{SWO \rightarrow EA}$      | 2.37E+09     | 2.36E+09     | 2.45E+09     | 2.37E+09     | 2.37E+09     |
| 3     | $M_{CA \rightarrow EA}$       | 2.47E+09     | 2.46E+09     | 2.55E+09     | 2.48E+09     | 2.48E+09     |
| 3     | $\Delta_{EA \rightarrow CA}$  | 6.84E+09     | 6.84E+09     | 7.05E+09     | 6.83E+09     | 6.83E+09     |
| 3     | $\Delta_{SWO \rightarrow EA}$ | 6.94E+09     | 6.96E+09     | 7.15E+09     | 6.94E+09     | 6.94E+09     |
| 3     | Genealogies                   | 3.53E+09     | 3.53E+09     | 3.64E+09     | 3.53E+09     | 3.53E+09     |
| 4     | $\theta_{SWO}$                | 4.74E+09     | 4.76E+09     | 4.73E+09     | 4.77E+09     | 4.77E+09     |
| 4     | $\theta_{CA}$                 | 3.77E+09     | 3.77E+09     | 3.79E+09     | 3.77E+09     | 3.77E+09     |
| 4     | $\theta_{EA}$                 | 4.49E+09     | 4.51E+09     | 4.51E+09     | 4.51E+09     | 4.51E+09     |
| 4     | $M_{CA \rightarrow SWO}$      | 2.42E+09     | 2.41E+09     | 2.41E+09     | 2.43E+09     | 2.42E+09     |
| 4     | $M_{EA \rightarrow SWO}$      | 2.46E+09     | 2.47E+09     | 2.46E+09     | 2.47E+09     | 2.47E+09     |
| 4     | $M_{SWO \rightarrow CA}$      | 2.21E+09     | 2.21E+09     | 2.20E+09     | 2.21E+09     | 2.22E+09     |
| 4     | $M_{EA \rightarrow CA}$       | 2.05E+09     | 2.05E+09     | 2.05E+09     | 2.06E+09     | 2.06E+09     |
| 4     | $M_{SWO \rightarrow EA}$      | 2.50E+09     | 2.50E+09     | 2.51E+09     | 2.51E+09     | 2.51E+09     |
| 4     | $M_{CA \rightarrow EA}$       | 2.38E+09     | 2.39E+09     | 2.39E+09     | 2.40E+09     | 2.39E+09     |
| 4     | $\Delta_{CA \rightarrow SWO}$ | 6.95E+09     | 6.95E+09     | 6.95E+09     | 6.95E+09     | 6.94E+09     |
| 4     | $\Delta_{CA \rightarrow EA}$  | 6.97E+09     | 6.96E+09     | 6.96E+09     | 6.97E+09     | 6.97E+09     |
| 4     | Genealogies                   | 3.52E+09     | 3.51E+09     | 3.51E+09     | 3.51E+09     | 3.50E+09     |

**Supplementary Table S9.** Marginal likelihoods for each model (1: island model without divergence; 2: CA and SWO diverged from EA; 3: CA and EA diverged from SWO; 4: CA and EA diverged from SWO) per replicate run for a random sub-sample of 5,000 RAD loci. The mean marginal likelihoods across replicate MIGRATE-N runs using different sub-samples of 5,000 RAD loci are also shown for each model. The best-supported model is highlighted in bold.

| Model                  | Sub-sample 1    | Sub-sample 2    | Sub-sample 3    | Sub-sample 4    | Sub-sample 5    | Mean            |
|------------------------|-----------------|-----------------|-----------------|-----------------|-----------------|-----------------|
| 1: Island              | -1639138        | -1640123        | -1641663        | -1645143        | -1648576        | -1642928        |
| <b>2: CA ←EA → SWO</b> | <b>-1629995</b> | <b>-1630927</b> | <b>-1632467</b> | <b>-1635943</b> | <b>-1639393</b> | <b>-1633745</b> |
| 3: CA ←SWO → EA        | -1630573        | -1631587        | -1632980        | -1636614        | -1640085        | -1634368        |
| 4: EA ←CA → SWO        | -1631734        | -1632719        | -1634234        | -1637678        | -1641204        | -1635514        |

**Supplementary Table S10.** Mean, median and 95% credible interval (CI) of parameter estimates of the best-supported model. Population divergence times ( $\tau$ ) are in units of  $N_e$  \* generations.

| Parameter                   | Mean   | Median | 2.5%   | 97.5%  |
|-----------------------------|--------|--------|--------|--------|
| $\theta_{SWO}$              | 0.0041 | 0.0041 | 0.0038 | 0.0043 |
| $\theta_{CA}$               | 0.0048 | 0.0048 | 0.0045 | 0.0050 |
| $\theta_{EA}$               | 0.0031 | 0.0031 | 0.0029 | 0.0033 |
| $M_{SWO \rightarrow CA}$    | 504.7  | 508.3  | 396.7  | 610.0  |
| $M_{SWO \rightarrow EA}$    | 251.4  | 255.0  | 144.0  | 354.0  |
| $M_{CA \rightarrow SWO}$    | 440.5  | 443.7  | 332.0  | 545.3  |
| $M_{CA \rightarrow EA}$     | 234.1  | 237.7  | 128.0  | 338.0  |
| $M_{EA \rightarrow SWO}$    | 710.0  | 713.0  | 598.7  | 817.3  |
| $M_{EA \rightarrow CA}$     | 800.7  | 804.3  | 688.7  | 908.7  |
| $\tau_{EA \rightarrow SWO}$ | 0.0345 | 0.0345 | 0.0316 | 0.0374 |
| $\tau_{EA \rightarrow CA}$  | 0.0290 | 0.0290 | 0.0261 | 0.0320 |

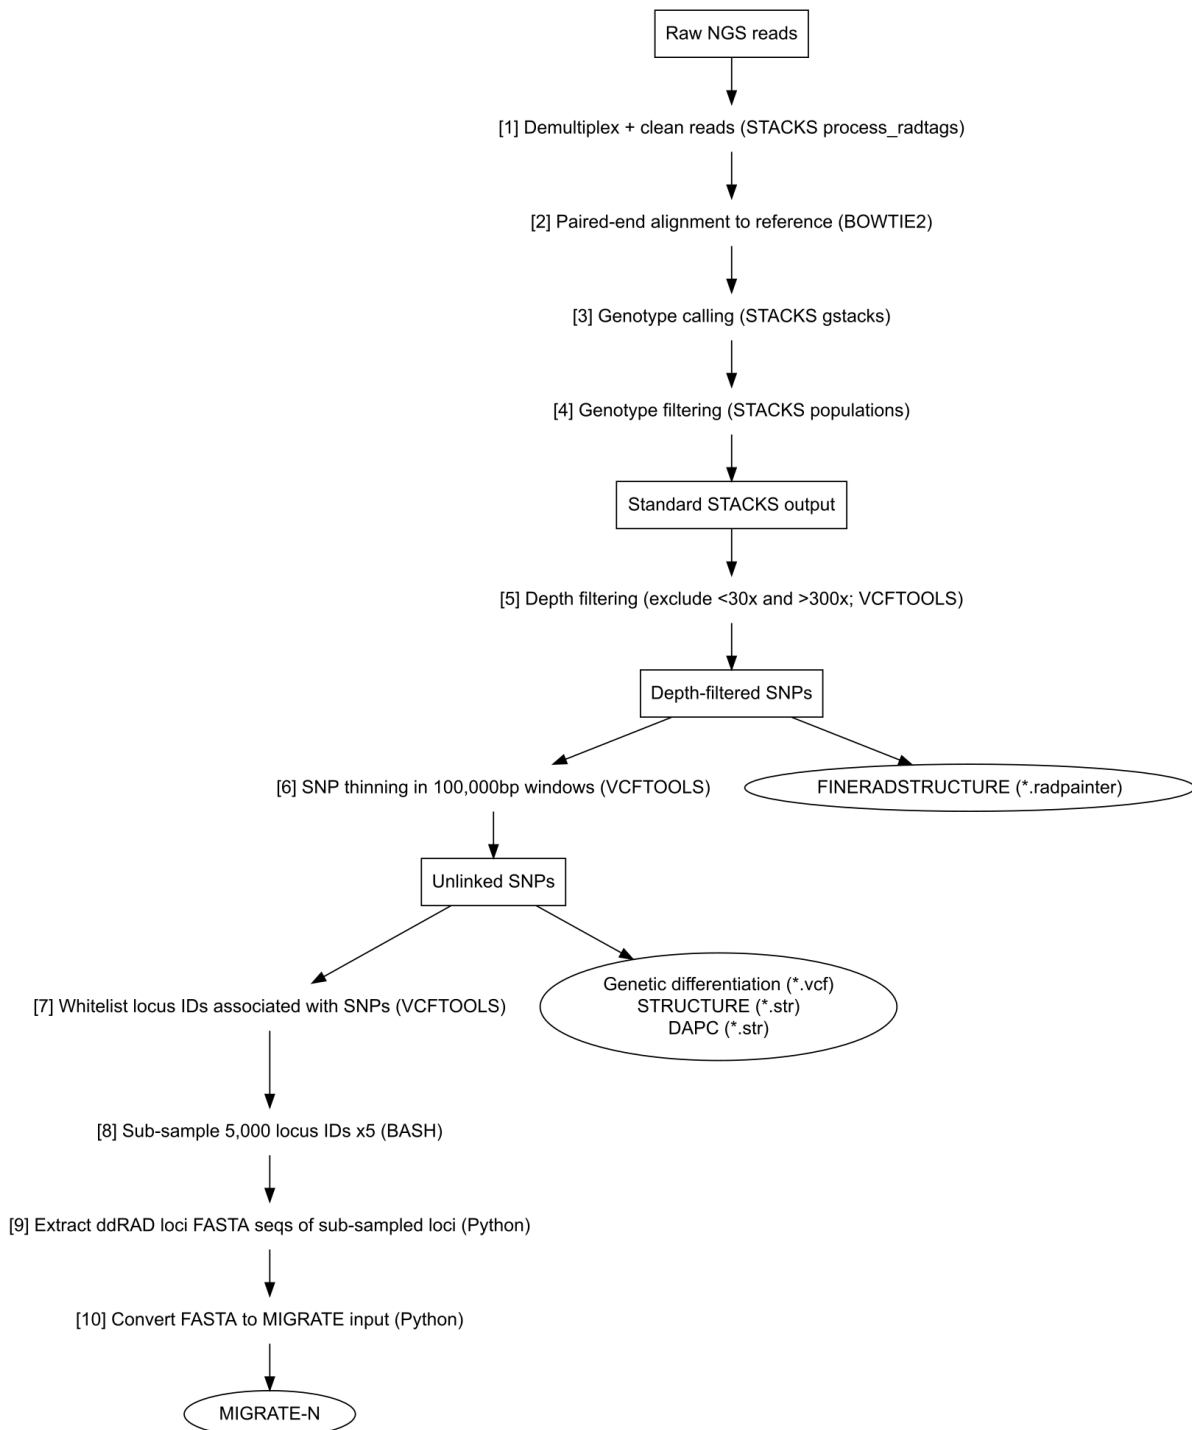

**Supplementary Figure S1.** (Continues on next page) Flowchart describing the steps of the bioinformatic pipeline, the data at key points in the pipeline and the analyses performed in the present study. Raw Illumina sequencing reads derived from 28 green turtle samples represented the starting point of the pipeline, which were [1] demultiplexed and cleaned and then [2] aligned to a reference genome in paired-end mode (reads without mates were aligned as unpaired reads). One East Atlantic sample (PI070009) aligned poorly (62%; Supplementary Table S1) and was excluded, resulting in the full data containing 27 samples (i.e.  $N = 27$ ). Next, we performed [3] genotype calling using STACKS' *gstacks* module and [4] genotype filtering using STACKS' *populations* module (note: all SNPs per locus were retained in this step), producing the 'standard STACKS output'. To filter SNPs with very low and high coverage (i.e. mean

depth across samples; estimated using VCFTOOLS), we additionally [5] excluded SNPs with <30x and >300x mean depth across samples (resulting in the *depth-filtered data*). The depth-filtered data was used in the FINERADSTRUCTURE analysis. FINERADSTRUCTURE uses haplotype- and linkage information, hence loci were not removed based upon physical proximity here. The remaining analyses (genetic differentiation, STRUCTURE and DAPC) required unlinked SNPs, which is why we [6] performed ‘thinning’ within 100,000 bp windows using VCFTOOLS prior to these analyses. Thinning resulted in a minimum distance of 100,000 bp between SNPs, yielding putatively unlinked SNPs. Due to the computational costs of Bayesian MCMC approaches and the size of our dataset, the MIGRATE-N analysis was performed using five random subsets of 5,000 loci sampled from the ~12,000 unlinked SNPs. First, we [7] created a whitelist containing the locus IDs associated with each unlinked SNP. Next, we [8] randomly sampled 5,000 locus IDs, replicated five times, using a custom BASH script (resulting in five random sub-samples of the whitelist created in [7]). Next, we [9] used a custom Python script that did the following: for each of the five sub-sampled whitelists, go through the locus IDs and extract the FASTA sequence of that locus from the *populations.samples.fa* FASTA file produced by STACKS after step [4]. This resulting in five datasets each contained 5,000 FASTA sequences, which were [10] converted to MIGRATE-N input files using a slightly modified version (i.e., print statements were changed to make the script work with Python3) of the *stacks2mig.py* script provided with MIGRATE-N.



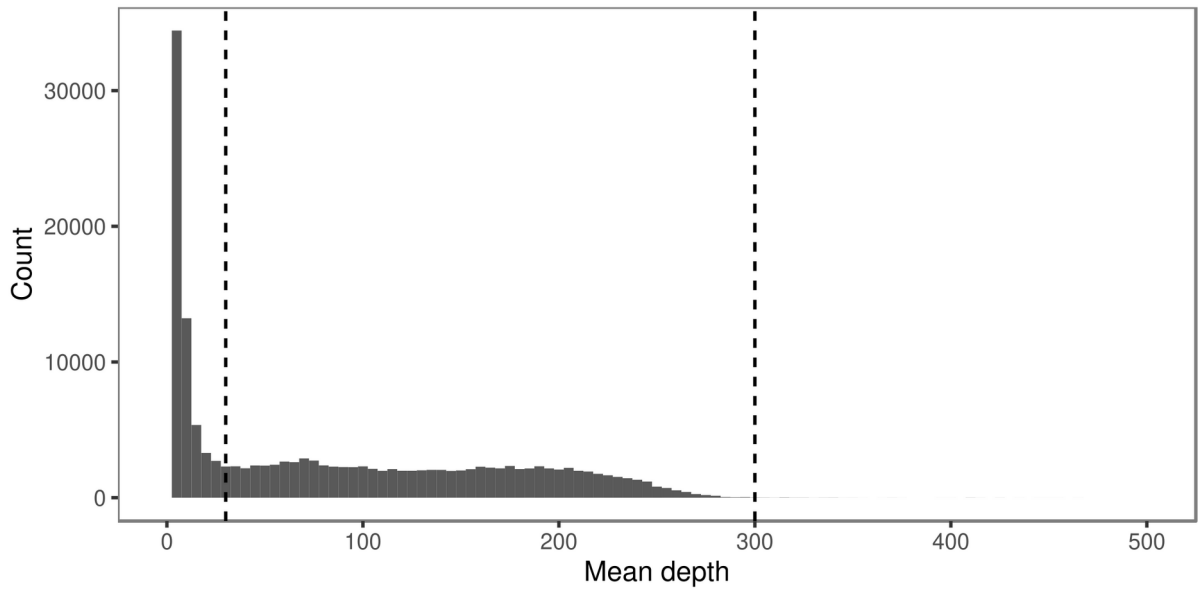

**Supplementary Figure S2.** Histograms of the distribution of mean sequencing depth per SNP averaged across all samples. Histogram bin-width was set to 5.

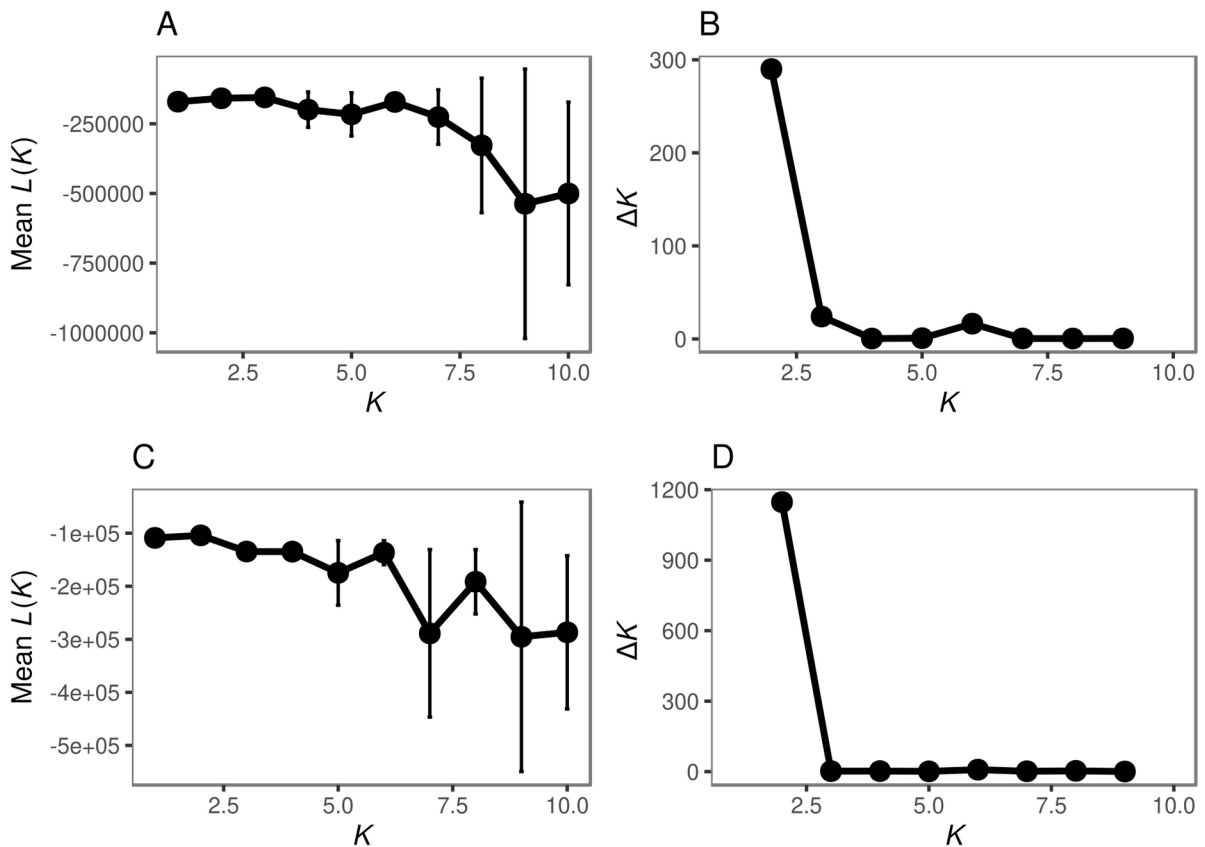

**Supplementary Figure S3.** Mean likelihood of  $K$  (left panels; A and C) and  $\Delta K$  (right panels; B and D) for up to  $K = 10$  clusters with 15 replicates per  $K$  estimated using STRUCTURE. Error bars depict standard deviations. Top panels (A and B): full data ( $N = 27$ ); bottom panels (C and D): full data, Atlantic samples only ( $N = 19$ ).

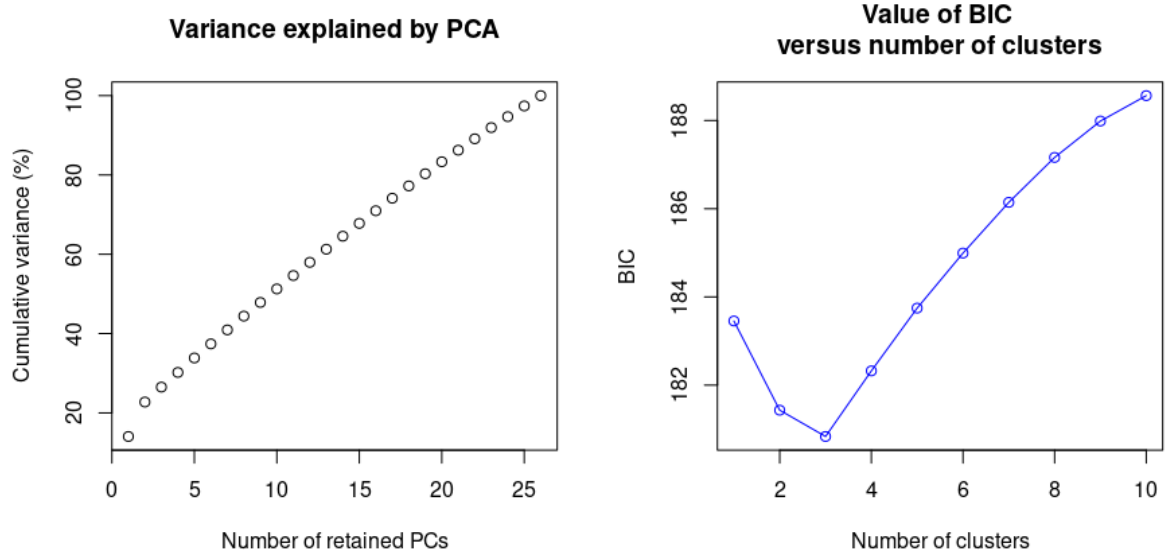

**Supplementary Figure S4.** Multivariate clustering results for the full data (CA, EA and SWO;  $N = 27$ ) showing the cumulative variance (%) explained versus the number of retained principal components (PCs; left panel) and the BIC score versus the number of clusters (right panel), retaining 18 PCs and three clusters.

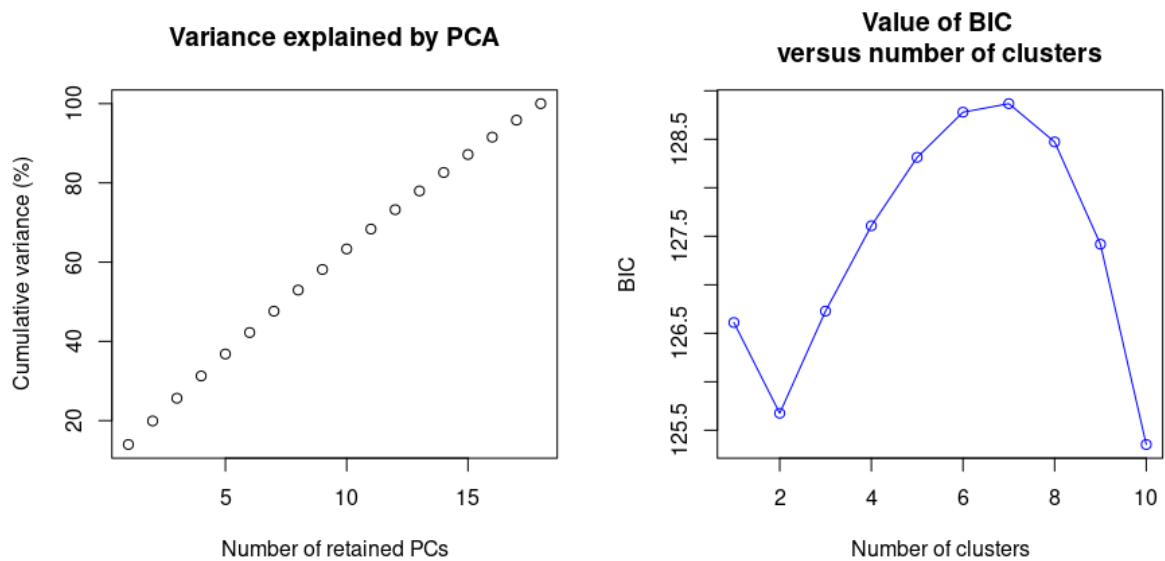

**Supplementary Figure S5.** Multivariate clustering results for the Atlantic data (CA and EA;  $N = 19$ ) showing the cumulative variance (%) explained versus the number of retained principal components (PCs; left panel) and the BIC score versus the number of clusters (right panel), retaining 12 PCs and two clusters.

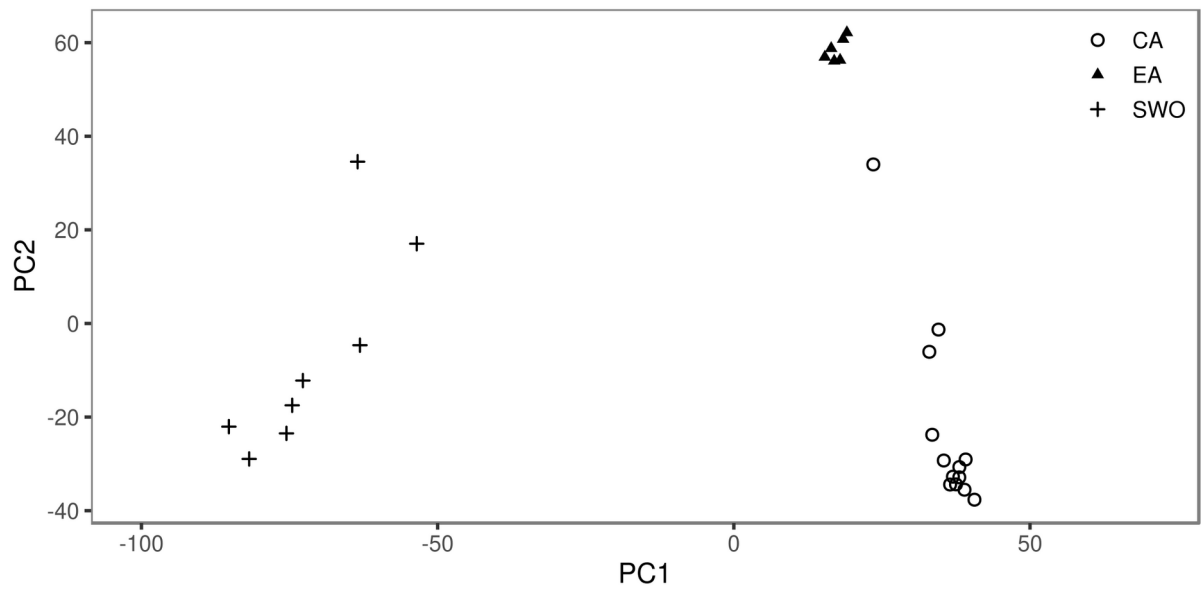

**Supplementary Figure S6.** Principal component analysis results, showing the first two principal components with individuals labelled by sampling location.

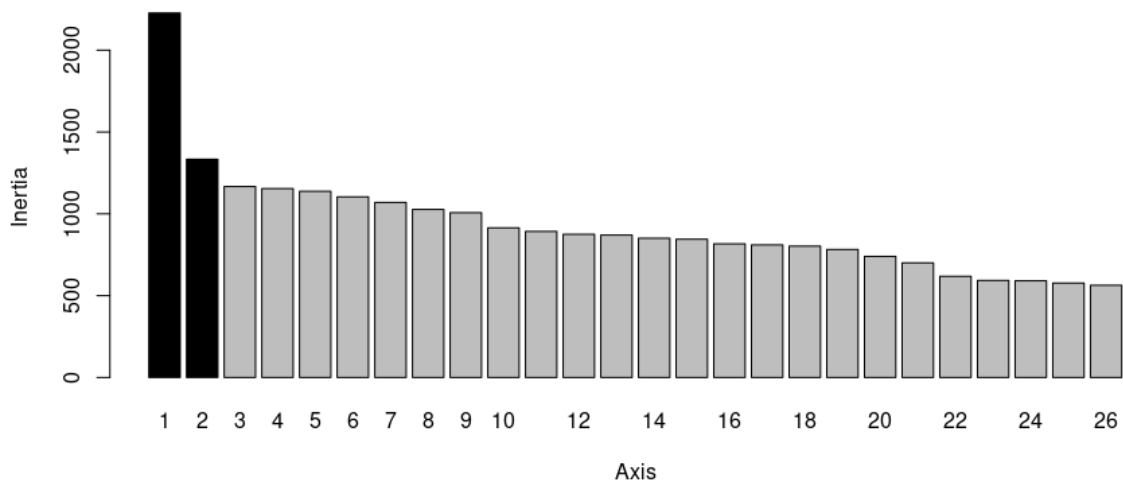

**Supplementary Figure S7.** Screeplot of total inertia (eigenvalues) across principal components. The break in inertia observed between the second and third principal component suggested most relevant structure was captured in the first two principal components (Jombart, 2009), which are highlighted in black.

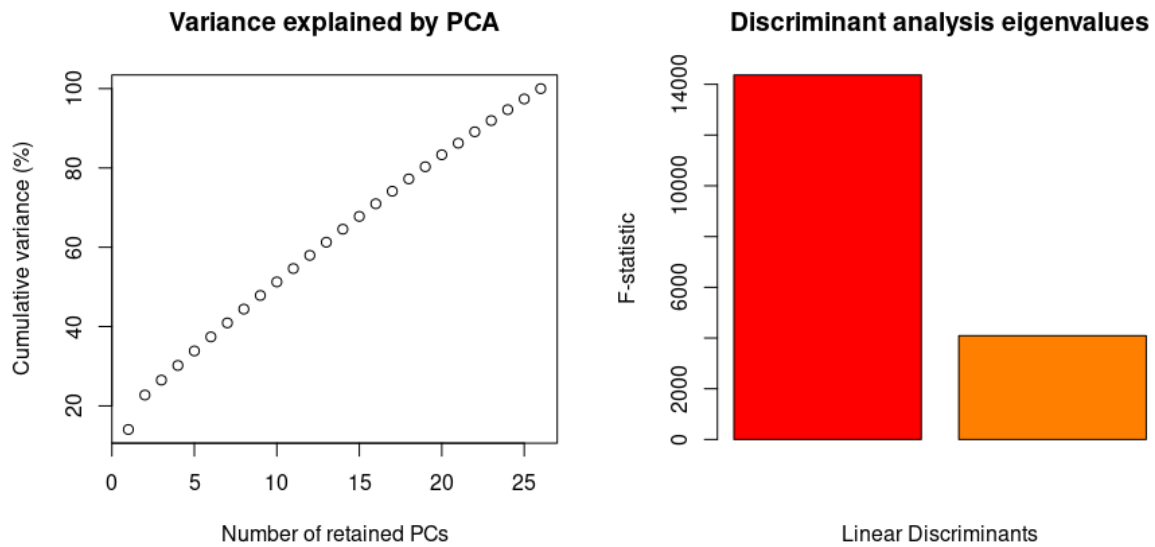

**Supplementary Figure S8.** DAPC results for the full data (CA, EA and SWO;  $N = 27$ ); cumulative variance (%) explained versus the number of retained principal components (PCs; left panel) and the eigenvalues of the linear discriminants (right panel). We retained 18 PCs and two linear discriminants.

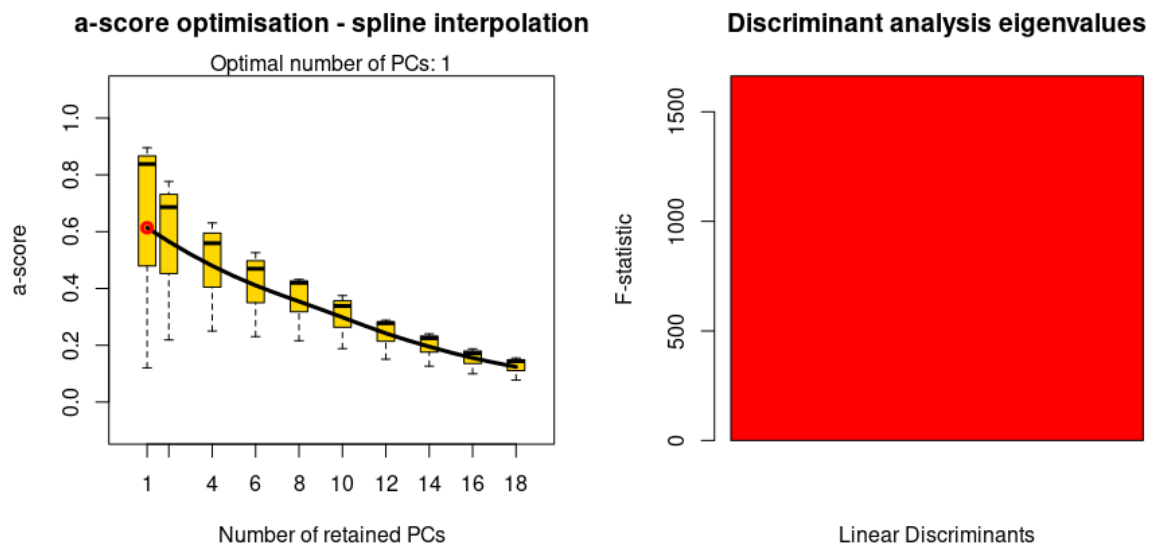

**Supplementary Figure S9.** DAPC results for the full data (CA, EA and SWO;  $N = 27$ ); optimal  $\alpha$ -scores versus the number of retained principal components (PCs; left table) and the eigenvalues of the linear discriminants (right panel). We retained one PC and one linear discriminant.

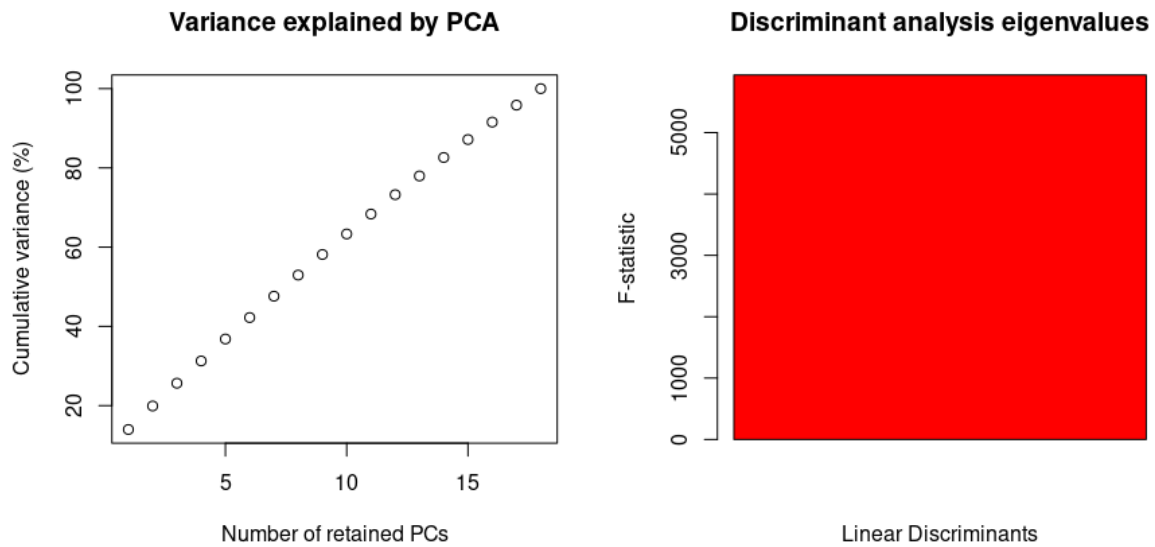

**Supplementary Figure S10.** DAPC results for the Atlantic data (CA and EA;  $N = 19$ ); cumulative variance (%) explained versus the number of retained principal components (PCs; left panel) and the eigenvalues of the linear discriminants (right panel). We retained 12 PCs and one linear discriminant.

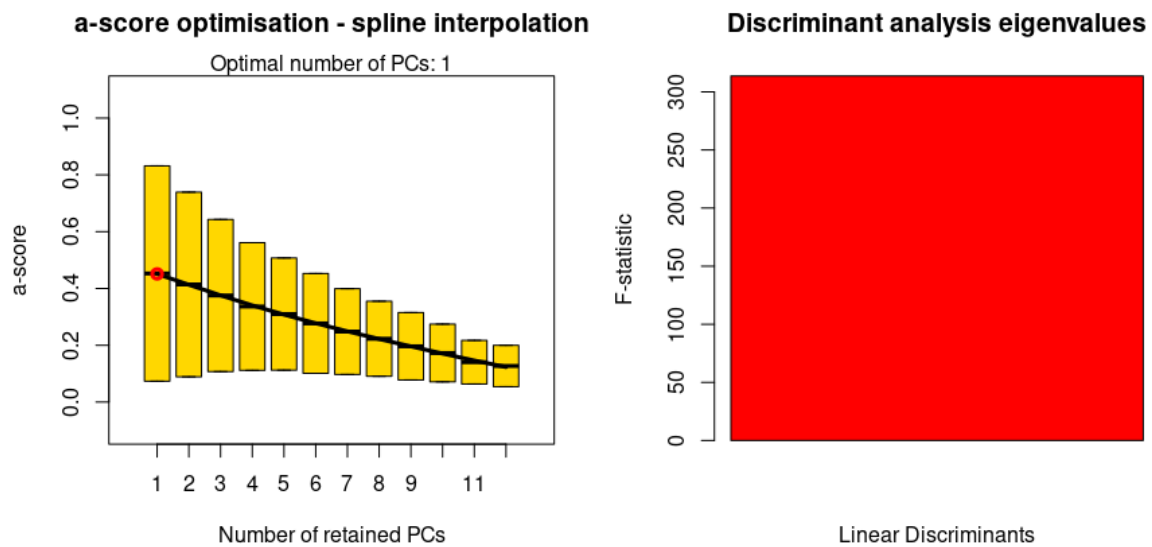

**Supplementary Figure S11.** DAPC results for the Atlantic data (CA and EA;  $N = 19$ ); optimal  $\alpha$ -scores versus the number of retained principal components (PCs; left table) and the eigenvalues of the linear discriminants (right panel). We retained one PC and one linear discriminant.

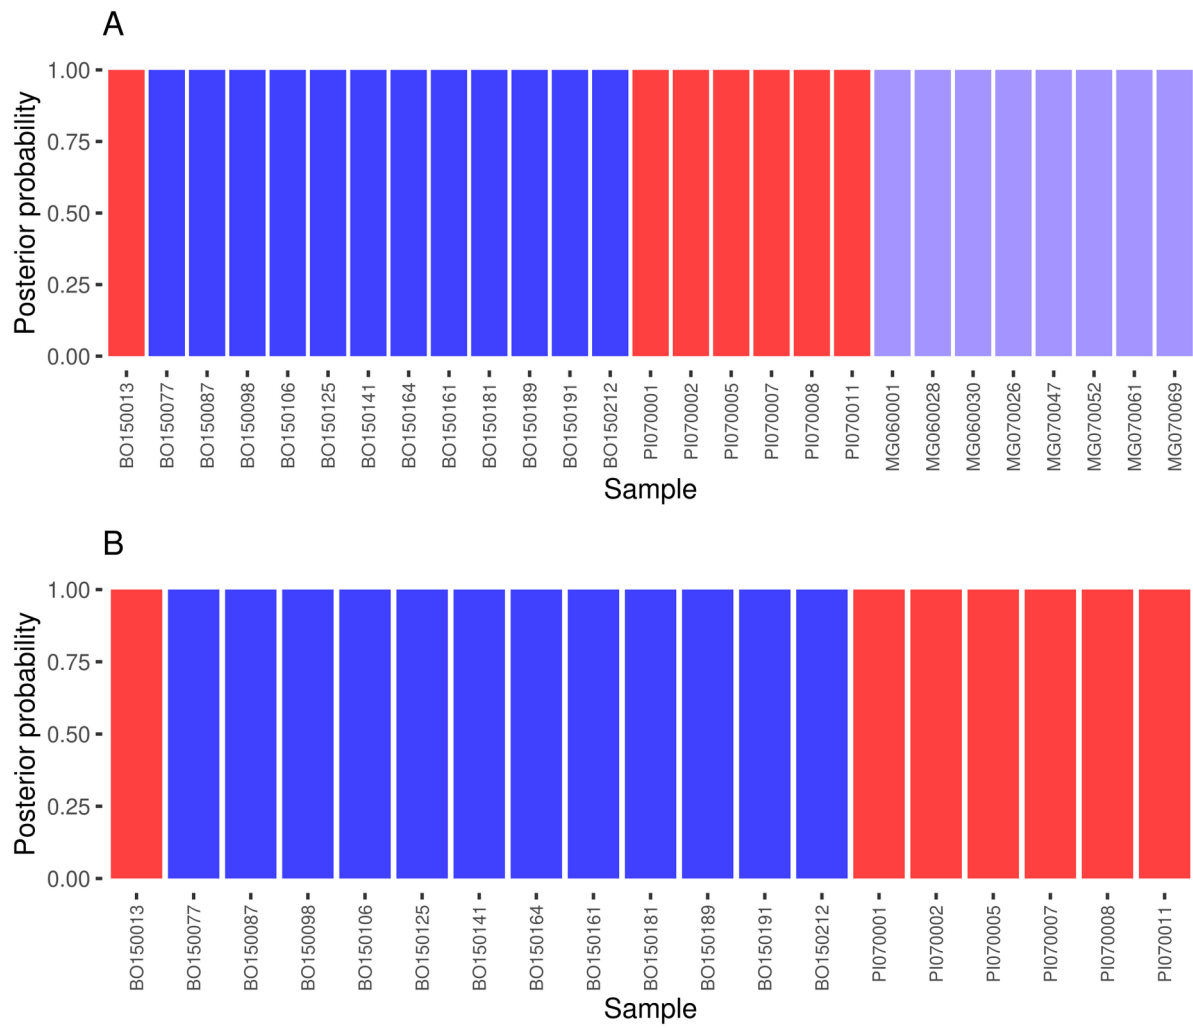

**Supplementary Figure S12.** Posterior group membership probabilities estimated via DAPC (retaining the number of PCs explaining ~80% of cumulative variance) for the A) full data (CA, EA and SWO;  $N = 27$ ) and B) the Atlantic data (CA and EA;  $N = 19$ ).

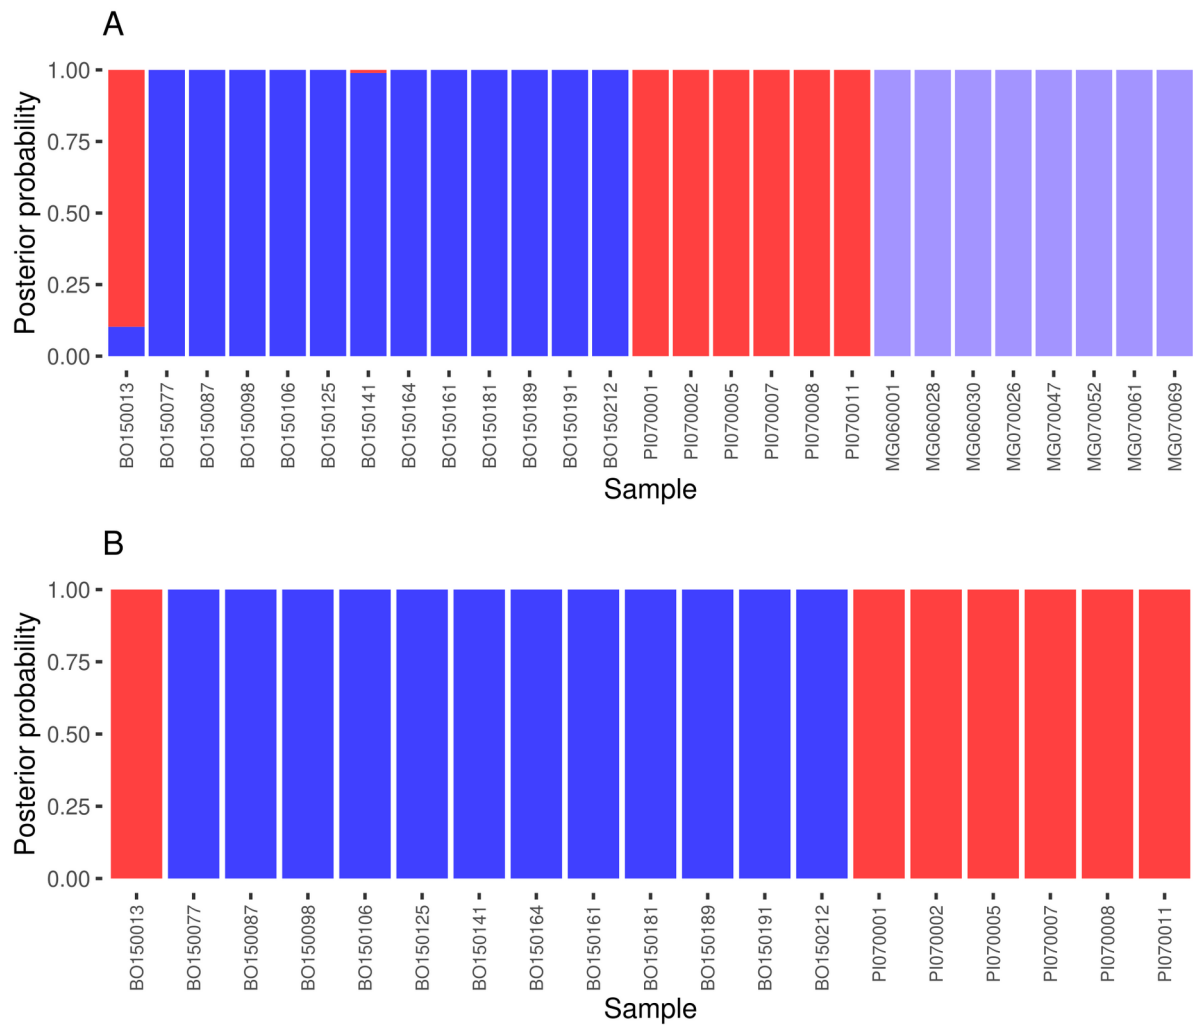

**Supplementary Figure S13.** Posterior group membership probabilities estimated via DAPC (retaining a single PC, which represented the optimal number of PCs according to  $\alpha$ -score optimization) for the A) full data (CA, EA and SWO;  $N = 27$ ) and B) Atlantic data (CA and EA;  $N = 19$ ).
